# Supplementary material
Source: MDPI journal article supplement (https://www.mdpi.com/2076-3417/5/3/344)
Supplement: s1 [file s1]

## Supplementary Materials

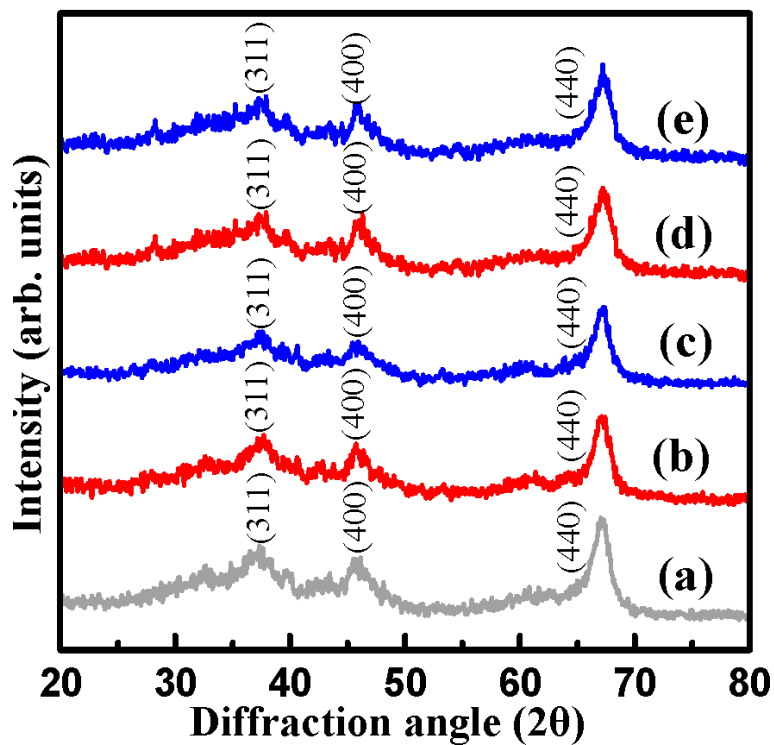

**Figure S1.** The XRD spectra of the catalysts: The as prepared ALVIR (a); RAWOS (b); and RAWS (c). The RAWOS and RAWS catalysts heat-treated at 650° C are given in (d) and (e), respectively.

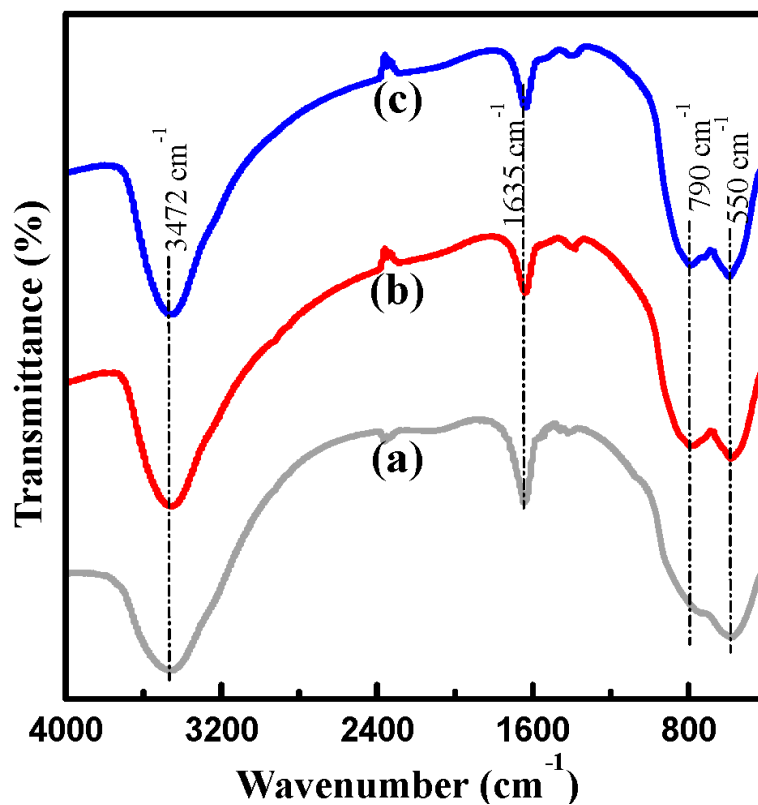

**Figure S2.** The FTIR spectra recorded for ALVIR, RAWOS and RAWS catalysts (a–c).
